# Supplementary material
Source: PubMed Central journal article supplement (PMC2604992)
Supplement: 0809770105_0809770105SI.pdf [file 0809770105_0809770105SI.pdf]

# Supporting Information

Padmanabhan et al. 10.1073/pnas.0809770105

## SI Text

**Sequence Analysis.** First, we identified the orthologous ORFs in the *C. dubliniensis* genome by comparing the amino acid sequences of *CEN* adjacent ORFs of all chromosomes of *C. albicans*. We performed a BLAST search for the ORFs flanking the centromeres of *C. albicans* against the *C. dubliniensis* database (<http://www.sanger.ac.uk/cgi-bin/blast/submitblast/c.dubliniensis>). Pairwise sequence alignment was performed using ClustalW (1) to analyze amino acid sequence homology between the ORFs of *C. albicans* and their homologs in *C. dubliniensis*. The synteny of the ORFs is maintained on both sides of the *CEN* regions in all chromosomes of *C. albicans* and *C. dubliniensis* except chromosome 6. Homologous ORFs in the *C. dubliniensis* genome were identified by a sequence analysis software Vector NTI (Invitrogen) where the minimum ORF length was set at 100 aa.

**Homology Detection and Mutation Rate Measurement.** We used Sigma (version 1.1.3) (2) and DIALIGN 2 (3) to align ORF-free centromeric and other intergenic sequences. Default parameters were used for both programs, but Sigma was given an auxiliary file of intergenic sequence from which to estimate a background model.

For protein-coding sequence, we ran WU-BLAST 2.0 (tblastn), querying each annotated coding region of *C. albicans* against the chromosome sequences of *C. dubliniensis*. Parameters used were “filter = seg matrix = blosum62 hspsepQmax = 1000 hspsepSmax = 2000.” Hits with a summed *P* value of  $\leq 1e-30$  were identified as potential orthologs. Criteria for ortholog assignment were sequence similarity and synteny (requiring at least two common syntenous immediate neighbors out of four). This led to 2,653 high-confidence predictions.

These orthologous genes were aligned (at the amino acid level) with T-Coffee (4). Then we considered the following seven amino acids when conserved, and coded by the indicated codons, in both species: GTn (valine), TCn (serine), CCn (proline), ACn (threonine), GCn (alanine), CGn (arginine), and GGn (glycine) (n, any nucleotide). Other synonymous codons, if any, were ignored. Leucine was ignored because of a variant codon, CTG, that codes for serine in these species. A naïve count of mutation rates in the third position yields 0.27. We improved on this by considering the genomewide bias for each codon, as follows: let the third-position conservation probability be *q*. Then if a third position nucleotide in *C. albicans* is *b*, in *C. dubliniensis* it stays *b* with probability *q* and mutates with probability  $(1 - q)$ . If it mutates, we assume that the probability of the new nucleotide is drawn from the known codon bias. For each amino acid *A*, we measure the individual mutation rates  $P(b_2/b_1, A)$  for the third-position codon, changing from *b*<sub>1</sub> in *C. albicans* to *b*<sub>2</sub> in *C. dubliniensis* (the results are mathematically identical for evolution from a common ancestor), and solve for *q*; we then take the weighted average of *q* for all amino acids and all pairs of observed third-position nucleotides *b*<sub>1</sub> and *b*<sub>2</sub>. This works out to *q* = 0.58, giving a mutation rate of 0.42. (Technically, this mutation rate is a slight overestimate, because we draw a mutated *b*<sub>2</sub> from a distribution that includes *b*<sub>1</sub>; but it is a credible upper bound.)

**Complementation Assay.** To examine whether CdCse4p can complement CaCse4p function, we constructed a *C. albicans* strain where the first allele of *CaCSE4* was disrupted using a *URA*-blaster cassette followed by recycling of the *URA3* marker, and the second allele was placed under control of the *PCK1* promoter (5). To disrupt the first *CaCSE4* allele, a 4.9-kb *URA*-blaster-based *CaCSE4* deletion cassette was released from pDC3 (6) as a *Sal*I-*Sac*I fragment and transformed BWP17, selecting for uridine

prototrophy. The correct integrant (CAKS1b) was selected by Southern analysis. Thereafter, a *Ura*<sup>-</sup> strain, obtained by intrachromosomal recombination between *hisG* repeats resulting in the loss of *URA3* marker, was selected on medium containing 5-fluoroorotic acid (5-FOA). The correct revertant (CAKS2b) was identified by PCR analysis. To place the wild-type *CSE4* allele under regulation of the *PCK1* promoter in CAKS2b we linearized p*PCK1*-*CSE4* (6) by *EcoRV* and used it to transform strain CAKS2b, selecting transformants for uridine prototrophy. The desired integrant (CAKS3b) carrying the only full-length copy of *CSE4* under control of the *PCK1* promoter was identified by PCR analysis. CAKS3b can grow on succinate medium (where the *PCK1* promoter is induced) but is unable to grow on glucose medium (where *PCK1* promoter is repressed) (Fig. 2A). To test whether CdCse4p can complement CaCse4p function, we cloned both Cd*CSE4* and Ca*CSE4* genes in an *ARS2/HIS1* plasmid, pAB1 (7). A 2.14-kb fragment carrying Cd*CSE4* (CdChr3 coordinates 170,543–172,683) and a 2.13-kb fragment carrying Ca*CSE4* (CaChr3 coordinates 172,252–174,384) genes along with their respective promoters and terminators were amplified using FCd*CSE4*/RCd*CSE4* and FCa*CSE4*/RCa*CSE4* primer pairs (see Table S2 for primer sequences), respectively. These amplified Cd*CSE4* and Ca*CSE4* sequences were digested with *Sac*I/*Hind*III and *Sac*I/*Xba*I, respectively, and cloned into corresponding sites of pAB1 to get pAB1Cd*CSE4* and pAB1Ca*CSE4*. Subsequently CAKS3b was transformed with pAB1, pAB1Ca*CSE4*, or pAB1Cd*CSE4* and transformants were selected for histidine prototrophy on succinate medium followed by streaking on succinate and glucose-containing media.

**Construction of CDM1 Carrying C-Terminally TAP-Tagged CdMIF2.** Cd*MIF2* downstream sequence (from +1,634 to +2,198 with respect to the start codon of Cd*MIF2*) was PCR amplified with primer pair CdM3 (CGG GGT ACC GAT TGC AAG AAG TAC TAC ATA AGA GAG) and CdM4 (GCC CGA GCT CGC AGG TAA AAT TGT TCT TGA GGA GCC G), thereby introducing *Kpn*I and *Sac*I restriction sites (underlined). The resulting PCR-amplified fragment was digested with *Kpn*I and *Sac*I and cloned into corresponding sites of pUC19 to generate pCDM1. The TAP cassette along with the *CaURA3* gene was released from plasmid pPK335 (8) as a *Bam*HI-*Kpn*I fragment and cloned into corresponding sites of pCDM1 to generate pCDM2. Subsequently the Cd*MIF2* ORF sequence from +1090 to +1548 was PCR amplified using primer pair CdM1 (ACG CGT CGA CCC CCC ACT GAT TAC GAT TAT GAA TCT GAT CC) and CdM2 (CAT GCC ATG GCC CAA TTC GTA TCG ATT TCT TCT GGT TTC) and cloned into pCDM2 as a *Nco*I-*Sal*I fragment to get pCDM3. Finally, a 2-kb amplicon was PCR amplified by the primer pair CdM1 and CdM4 using pCDM3 as the template. This PCR fragment was used to transform the CdUM4B strain (9). The correct *Ura*<sup>+</sup> transformant (CDM1) was identified by PCR analysis.

**Indirect Immunofluorescence.** Asynchronously grown cells of Cd36 or CDM1 were fixed with 37% formaldehyde at room temperature for 1 h. Antibodies were diluted as follows: 1:30 for anti- $\alpha$ -tubulin (YOL1/34) (Abcam), 1:500 for affinity-purified rabbit anti-Ca/CdCse4p (6) and rabbit anti-Protein A (Sigma), 1:500 for Alexa fluor 488 goat anti-rat IgG (Invitrogen), and 1:500 for Alexa fluor 568 goat anti-rabbit IgG (Invitrogen). The positions of nuclei of the cells were determined by staining with 4',6-diamidino-2-phenylindole (DAPI) as described previously (6). Cells were examined at 100[mult] magnification on a confocal laser scanning microscope (LSM 510 META, Carl Zeiss). Using LSM 5 Image

Examiner, digital images were captured. Images were processed by Adobe PhotoShop software.

**ChIP Assay.** Chromatin immunoprecipitation (ChIP) by anti-CdCse4 antibodies followed by PCR analysis was done as described previously (10), which suggests that the predicted centromeric regions of all chromosomes of *C. dubliniensis* are enriched in centromeric-specific histone (CdCse4p) binding. Asynchronously grown culture of Cd36 was crosslinked with formaldehyde and sonicated to get chromatin fragments of an average size of 300–500 bp. The fragments were immunoprecipitated with anti-Ca/CdCse4p antibodies and checked by PCR. PCR was set up using 10 pmol of both forward and reverse primers (MWG Biotech and Ocimum Biosolutions), 5  $\mu$ l of 10[mult] Taq buffer (Sigma), 5  $\mu$ l of 2.5 mM dNTPs mix, 2  $\mu$ l of DNA template, and 0.3  $\mu$ l of Taq polymerase (Sigma) in a 50- $\mu$ l reaction volume. PCR amplification was carried out using a PCR machine (Bio-Rad) with the following conditions: 1 min at 94 °C (denaturation), 30 s at 45 °C–55 °C (annealing temperature is variable with the primers used), and 1 min at 72 °C

(extension). A final extension of 4 min was given at 72 °C. PCR with total DNA (1:10 dilution) and plus or minus antibody ChIP DNA fractions were performed using one-twenty-fifth of the template. The boundaries of the *CEN* regions on each chromosome of *C. dubliniensis* were mapped using semiquantitative ChIP-PCR in strain Cd36. Sequence-specific PCR primers were designed at  $\approx$ 1-kb sequence intervals that span the putative *CEN* region of each chromosome of *C. dubliniensis* (Table S2). CdLEU2 PCR primers were used as an internal control in all PCR reactions. PCR amplification was performed and the PCR products were resolved on 1.5% agarose gels and band intensities were quantified using Quantity One 1-D Analysis Software (Bio-Rad). Enrichment values equal (+Ab) minus (–Ab) signals divided by the total DNA signal and were normalized to a value of 1 for *LEU2*. The PCR primers used in this study are listed in Table S2. Similarly, a ChIP assay to determine occupancy of TAP-tagged CdMif2p was performed using the strain CDM1 with anti-Protein A antibodies. All other conditions were identical to those described above for CdCse4p ChIP antibodies.

1. Thompson J-D, Higgins D-G, Gibson T-J (1994) CLUSTAL W: improving the sensitivity of progressive multiple sequence alignment through sequence weighting, position-specific gap penalties and weight matrix choice. *Nucleic Acids Res* 22:4673–4680.
2. Siddharthan R (2006) Sigma: multiple alignment of weakly-conserved non-coding DNA sequence. *BMC Bioinformatics* 7:143.
3. Morgenstern B (1999) DIALIGN2: improvement of the segment-to-segment approach to multiple sequence alignment. *Bioinformatics* 15:211–218.
4. Notredame C, Higgins D, Heringa J (2000) T-Coffee: a novel method for multiple sequence alignments. *J Mol Biol* 302:205–217.
5. Leuker C-E, Sonneborn A, Delbruck S, Ernst J-F (1997) Sequence and promoter regulation of the *PCK1* gene encoding phosphoenolpyruvate carboxykinase of the fungal pathogen *Candida albicans*. *Gene* 192:235–240.
6. Sanyal K, Carbon J (2002) The CENP-A homolog CaCse4p in the pathogenic yeast *Candida albicans* is a centromere protein essential for chromosome transmission. *Proc Natl Acad Sci USA* 99:12969–12974.
7. Baum M, Sanyal K, Mishra P-K, Thaler N, Carbon J (2006) Formation of functional centromeric chromatin is specified epigenetically in *Candida albicans*. *Proc Natl Acad Sci USA* 103:14877–14882.
8. Corvey C, et al. (2005) Carbon source-dependent assembly of the Snf1p kinase complex in *Candida albicans*. *J Biol Chem* 280:25323–25330.
9. Staib P, Moran G-P, Sullivan D-J, Coleman D-C, Morschhauser J (2001) Isogenic strain construction and gene targeting in *Candida dubliniensis*. *J Bacteriol* 183:2859–2865.
10. Sanyal K, Baum M, Carbon J (2004) Centromeric DNA sequences in the pathogenic yeast *Candida albicans* are all different and unique. *Proc Natl Acad Sci USA* 101:11374–11379.
11. Kumar S, Tamura K, Nei M (2004) MEGA3: integrated software for molecular evolutionary genetics analysis and sequence alignment. *Brief Bioinform* 5:150–163.
12. Mishra P-K, Baum M, Carbon J (2007) Centromere size and position in *Candida albicans* are evolutionarily conserved independent of DNA sequence heterogeneity. *Mol Genet Genomics* 278:455–465.
13. Sullivan D-J, Westerneng T-J, Haynes K-A, Bennett D-E, Coleman D-C (1995) *Candida dubliniensis* sp. nov.: phenotypic and molecular characterization of a novel species associated with oral candidosis in HIV-infected individuals. *Microbiology* 141:1507–1521.
14. Wilson R-B, Davis D, Mitchell A-P (1999) Rapid hypothesis testing with *Candida albicans* through gene disruption with short homology regions. *J Bacteriol* 181:1868–1874.

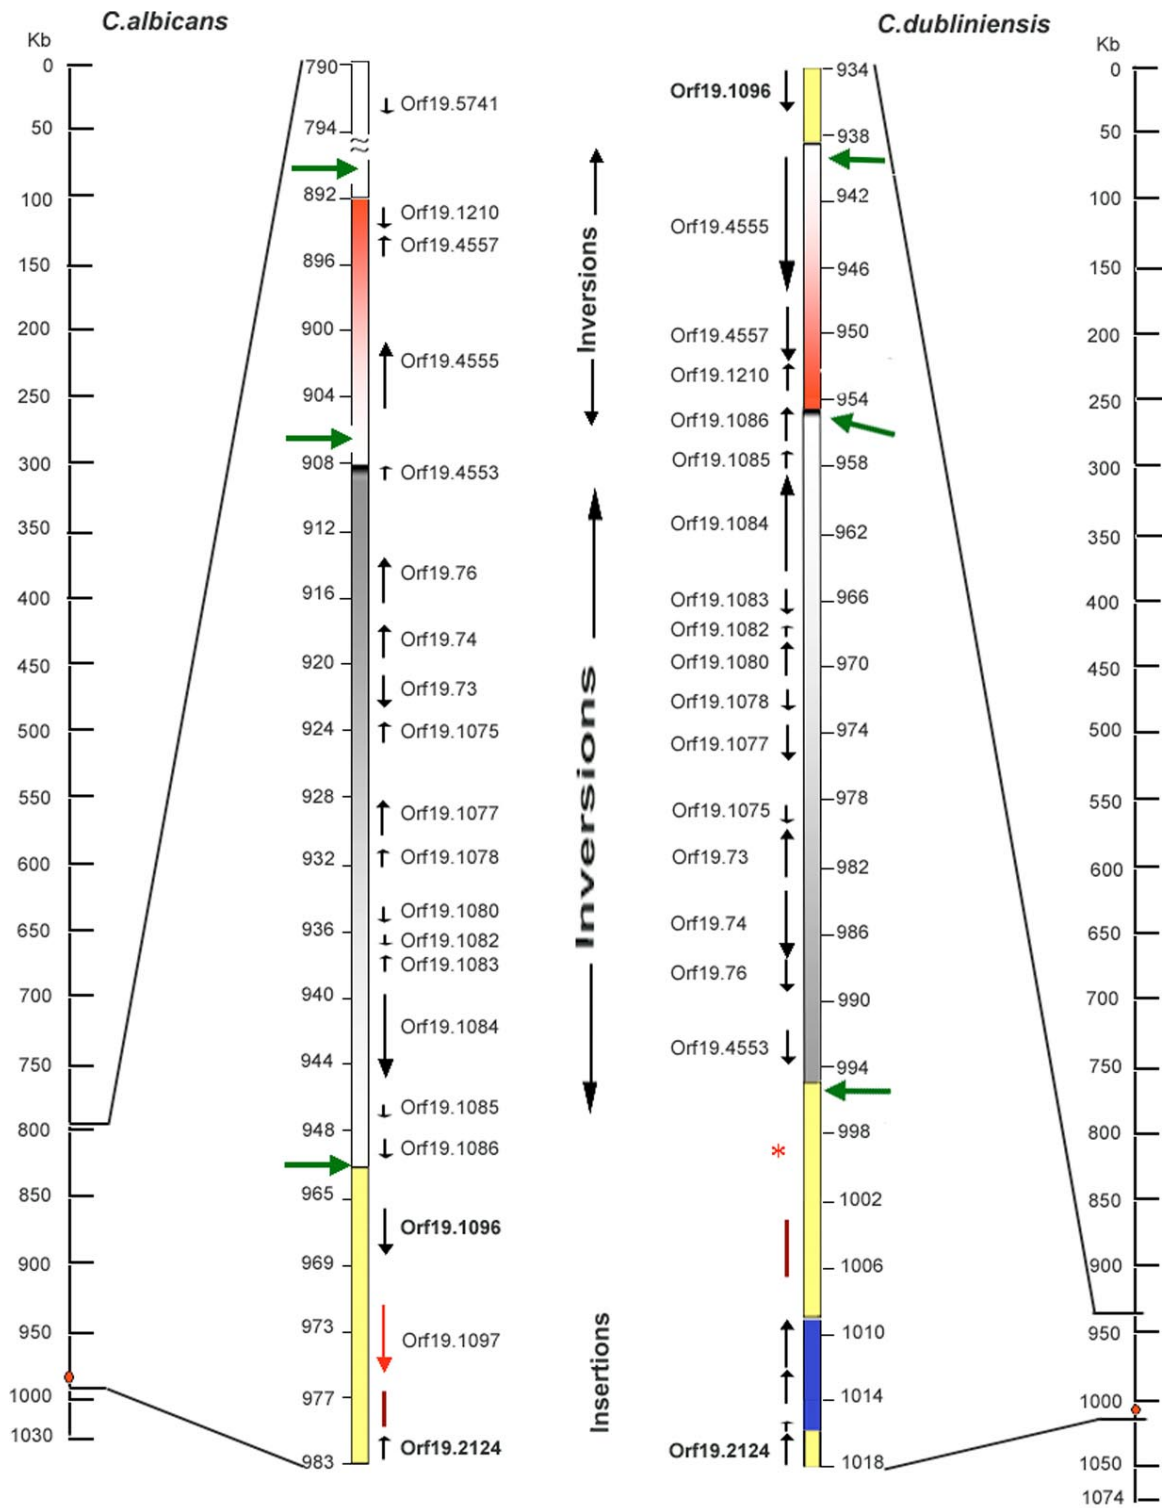

**Fig. S1.** Comparative analysis of the *CEN6* region of *C. albicans* and its orthologous region in *C. dubliniensis* showing genome rearrangement. Chromosomal maps of chromosome 6 of *C. albicans* and *C. dubliniensis* are shown, where the red dots represent the *CEN* regions. Black arrows along with the ORF numbers show the gene arrangement and the direction of transcription. Two paracentric inversions in *C. dubliniensis* are marked in shaded red and gray boxes. The direction of the shaded boxes (gradation of colors) represents the inversions that have occurred in *C. dubliniensis* when compared to *C. albicans*. The green arrows show the breakpoints where the inversions have occurred. The blue region in *C. dubliniensis* shows the region of insertions of ORFs from other chromosomes. The yellow regions are unaltered. The orange arrow shows Orf19.1097 in *C. albicans* and the orange star in the *C. dubliniensis* map shows that there is a premature termination codon in the Orf19.1097 homolog of *C. albicans* in *C. dubliniensis*. Brown bar, Cse4p-binding region.

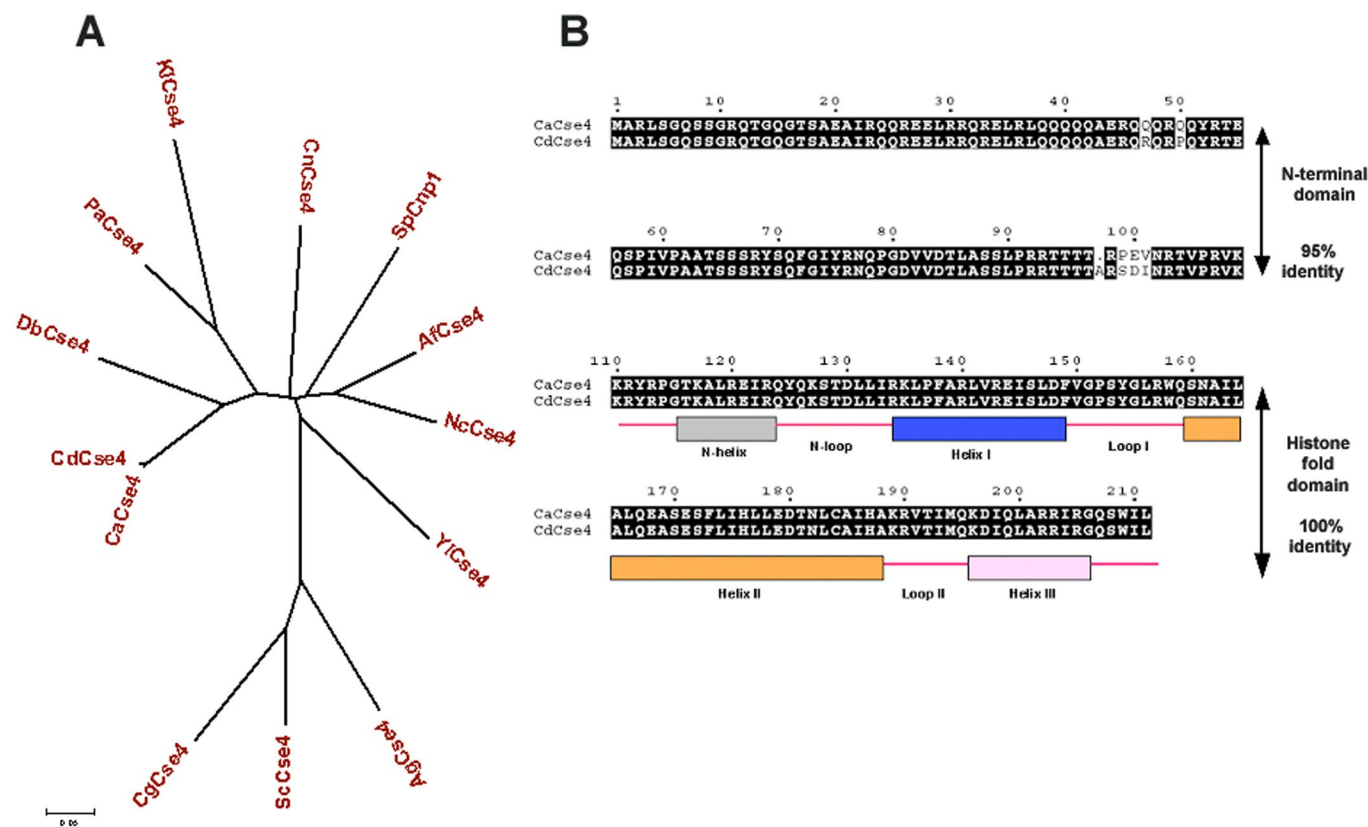

**Fig. S2.** The centromeric histone in *C. dubliniensis*, CdCse4p, belongs to the Cse4p/CENP-A family. (A) Phylogenetic tree of the Cse4 protein sequences in yeasts in the radiation format using the neighbor-joining method of Molecular Evolutionary Genetics Analysis version 3.1 (MEGA) software (11), showing that Cse4 proteins in *C. albicans* and *C. dubliniensis* are highly related. Ca, *Candida albicans*; Cd, *C. dubliniensis*; Db, *Debaryomyces hansenii*; Pa, *Pichia angusta*; Kl, *Kluyveromyces lactis*; Cn, *Cryptococcus neoformans*; Sp, *Schizosaccharomyces pombe*; Af, *Aspergillus fumigatus*; Nc, *Neurospora crassa*; Yl, *Yarrowia lipolytica*; Ag, *Ashbya gossypii*; Sc, *Saccharomyces cerevisiae*; Cg, *Candida glabrata*. (B) Pairwise comparison of Cse4p in *C. albicans* and *C. dubliniensis* showing homologies in the N-terminal region and the C-terminal histone-fold domain.



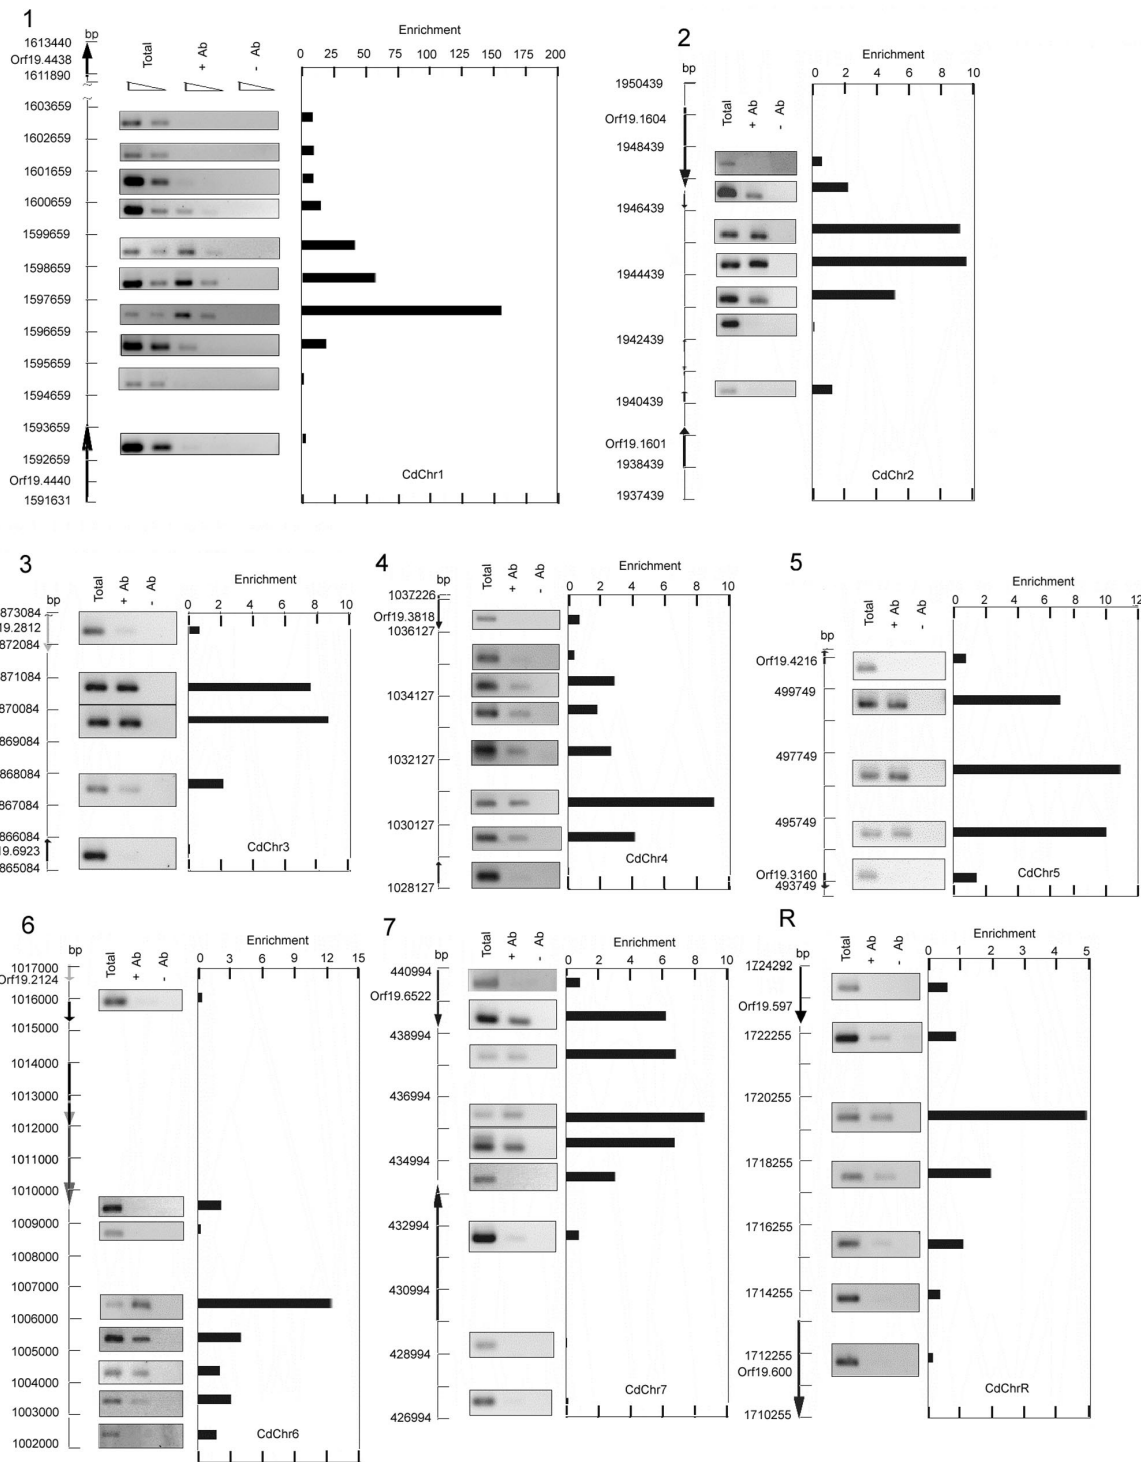

**Fig. S3.** Relative enrichment profiles of CdCse4p in various *C. dubliniensis* chromosomes. CdCse4p-associated chromosome regions were enriched by ChIP using anti-Ca/CdCse4p antibodies. Specific primers corresponding to putative centromere regions of *C. dubliniensis* were used to PCR amplify DNA fragments (150–300 bp) located at specific intervals as indicated (Table S2). PCR was performed on total, immunoprecipitated (+Ab), and beads-only control (–Ab) DNA fractions. Reverse images of ethidium bromide-stained PCR products resolved on 1.5% agarose gels are aligned with respect to their chromosomal map position of each *CEN* region. The coordinates of primer locations are based on the present version (May 16, 2007) of the *Candida dubliniensis* genome database. Enrichment values are calculated by determining the intensities of (+Ab) minus (–Ab) signals divided by the total DNA signals and are normalized to a value of 1 for the values obtained for a noncentromeric locus (CdLEU2). The intensity of each band was determined by using Quantity One 1-D Analysis Software (Bio-Rad). The CdCse4p enrichment profiles on *C. dubliniensis* chromosomes at corresponding regions are indicated. Solid arrows and shaded arrows correspond to complete and incomplete ORFs, respectively, and indicate the direction of transcription.

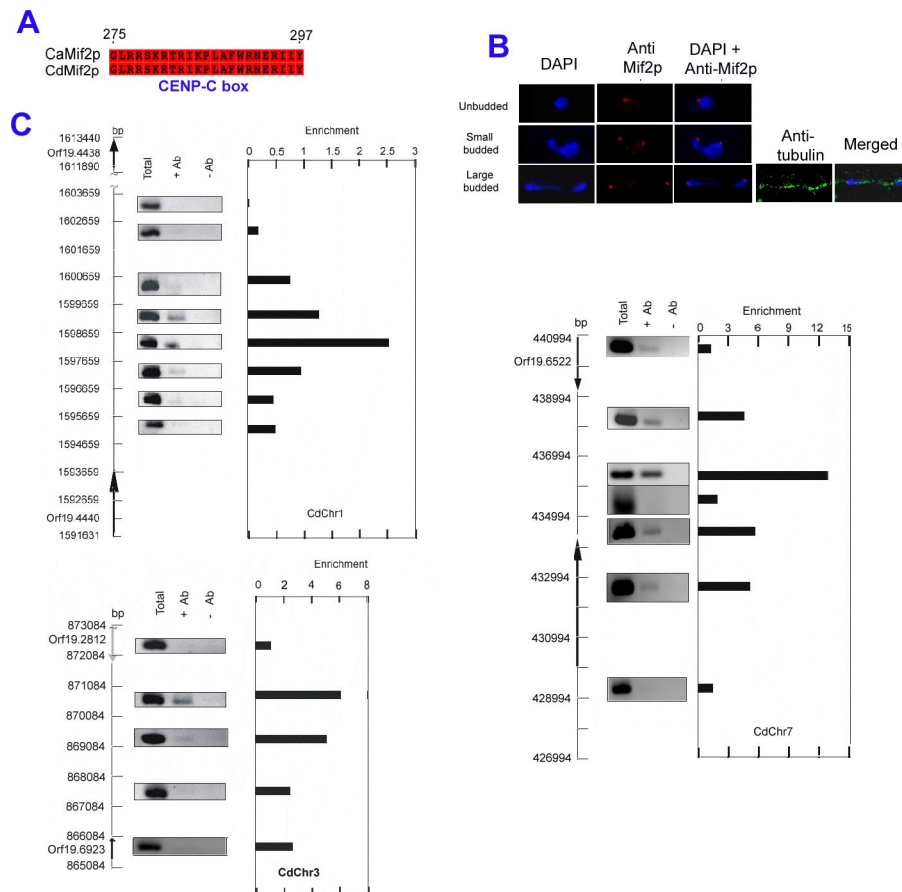

**Fig. S4.** The CENP-C homolog in *C. dubliniensis* (CdMif2p) is colocalized with CdCse4p. (A) Sequence alignment of CaMif2p and CdMif2p showing the conserved CENP-C block (red box). (B) Localization of CdMif2p at various stages of the cell cycle in *C. dubliniensis*. (C) ChIP enrichment profiles of CdMif2p on chromosomes 1, 3, and 7 in the strain CDM1 by determining the intensities of (+Ab) minus (–Ab) signals divided by the total DNA signals and are normalized to a value of 1 for the values obtained for a noncentromeric locus (CdLEU2) (see Table S2 for primers).

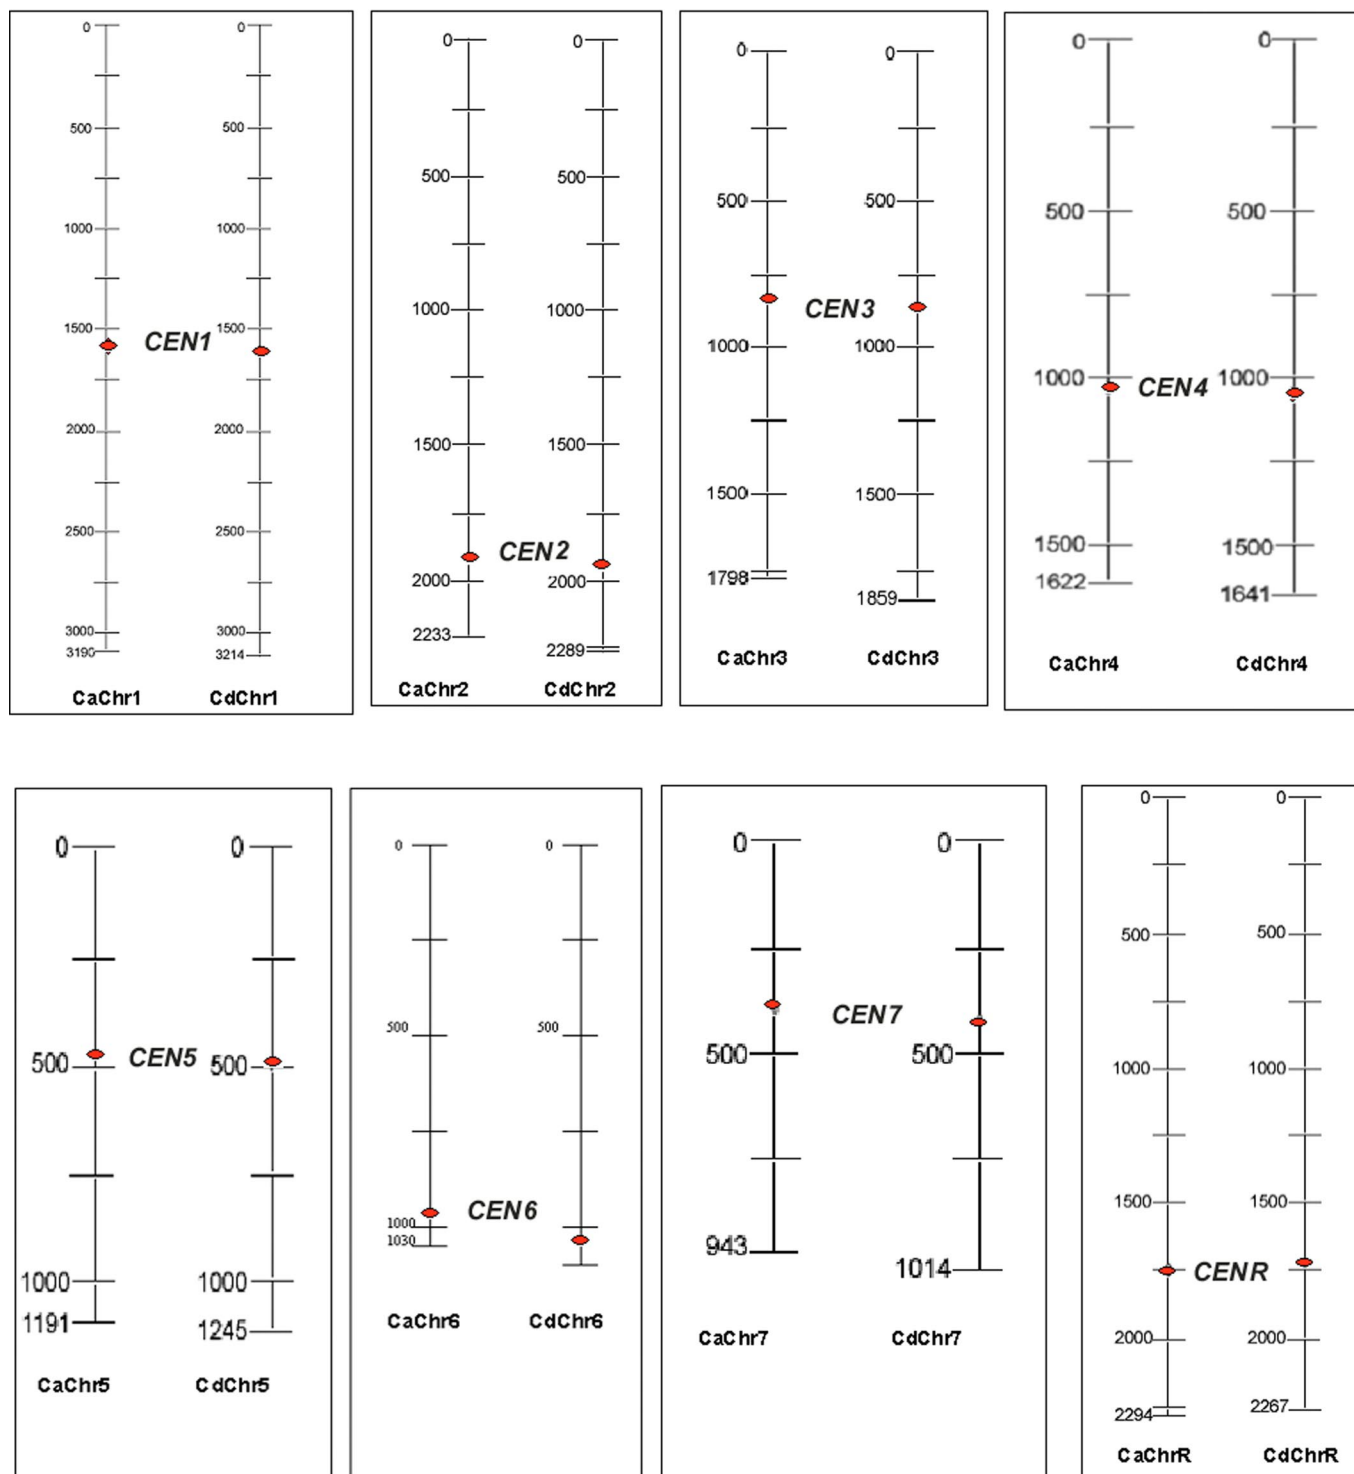

Fig. S5. Relative chromosomal positions of Cse4p-binding regions in *C. albicans* and *C. dubliniensis*. Red ovals, Cse4p-binding regions.

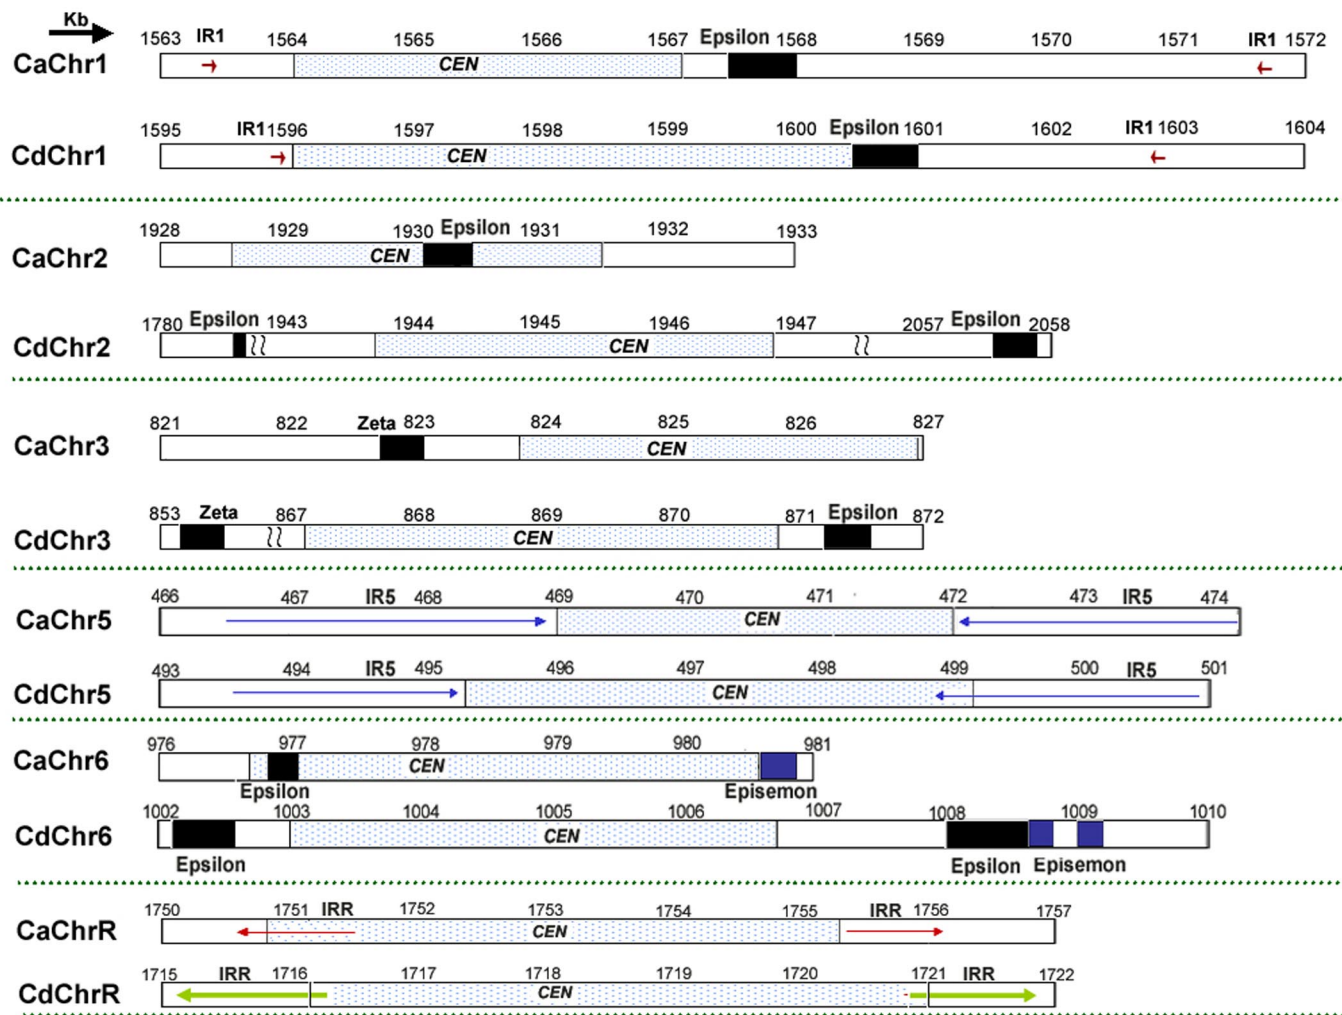

**Fig. S6.** Conserved blocks in the pericentric regions of various chromosomes of *C. dubliniensis* and *C. albicans*. The cyan stippled blocks represent the Cse4p-binding regions. DNA sequence stretches of various chromosomes having significant similarities (ClustalW scores >80) are shown by colored arrows as indicated. The numbers on the chromosomes represent their coordinates in their respective genome database. The direction of the arrows represents the orientation of repeats. A BLAST search was done to identify the repeats flanking the CEN region against the *C. dubliniensis* genome database with *C. albicans* CEN flanking repeats as the query sequences (12). The inverted repeats were observed in the chromosomes R, 1, and 5 of *C. albicans* and *C. dubliniensis* (see Table S4). The LTRs such as epsilon, zeta, episemon are also shown.



**Table S1. Comparison of the amino acid sequence homology of the ORFs flanking the *CEN* regions in *C. albicans* and *C. dubliniensis***

| Chr no. | <i>C. albicans</i><br>ORF no. | <i>C. dubliniensis</i><br>ORF no. | <i>C. albicans</i>         |                      | <i>C. dubliniensis</i>  |                      |             | Amino acid<br>homology<br>(%) |
|---------|-------------------------------|-----------------------------------|----------------------------|----------------------|-------------------------|----------------------|-------------|-------------------------------|
|         |                               |                                   | Chromosomal<br>coordinates | Amino acid<br>length | Chromosomal coordinates | Amino acid<br>length | Orientation |                               |
| 1       | 4438                          | Cd36.06830                        | 1580117–1581640            | 507                  | 1611890–1613440         | 516                  | Direct      | 88                            |
|         | 4440                          | Cd36.06810                        | 1559352–1561871            | 839                  | 1591631–1594162         | 843                  | Direct      | 91                            |
| 2       | 1601                          | Cd36.23540                        | 1923194–1924363            | 389                  | 1938439–1939608         | 389                  | Direct      | 99                            |
|         | 1604                          | Cd36.23560                        | 1934775–1931570            | 916                  | 1947203–1949623         | 806                  | Reverse     | 84                            |
| 3       | 2812                          | Cd36.83930                        | 828667–827105              | 503                  | 871879–873366           | 495                  | Reverse     | 84                            |
|         | 6923                          | Cd36.83920                        | 820347–821378              | 343                  | 865253–866083           | 276                  | Direct      | 90                            |
| 4       | 3818                          | Cd36.44310                        | 1010148–1009312            | 278                  | 1036396–1037226         | 276                  | Reverse     | 88                            |
|         | 3821                          | Cd36.44290                        | 1000558–999371             | 395                  | 1025948–1027126         | 392                  | Reverse     | 81                            |
| 5       | 3160                          | Cd36.51930                        | 467208–466702              | 168                  | 493689–494072           | 127                  | Reverse     | 95                            |
|         | 4216                          | Cd36.51940                        | 473741–474247              | 168                  | 500592–500975           | 127                  | Direct      | 94                            |
| 6       | 1096                          | Cd36.64780                        | 965934–968573              | 879                  | 934029–936683           | 884                  | Direct      | 84                            |
|         | 2124                          | Cd36.65100                        | 982460–981390              | 353                  | 1016599–1017672         | 357                  | Reverse     | 87                            |
| 7       | 6522                          | Cd36.71800                        | 431903–430173              | 586                  | 439178–440899           | 573                  | Reverse     | 94                            |
|         | 6524                          | Cd36.71780                        | 423631–422459              | 390                  | 424821–425993           | 390                  | Reverse     | 99                            |
| R       | 597                           | Cd36.33630                        | 1759087–1757405            | 560                  | 1722610–1724292         | 560                  | Reverse     | 97                            |
|         | 600                           | Cd36.33620                        | 1748818–1745649            | 1056                 | 1710255–1713449         | 1064                 | Reverse     | 90                            |

The coordinates of the *C. albicans* and *C. dubliniensis* chromosomes correspond to Assembly 20 of the *Candida albicans* Genome Database and the present version of the *Candida dubliniensis* Genome Database (May 16, 2007). As no true homolog of Orf19.3820 is present in chromosome 4 of *C. dubliniensis*, we considered Orf19.3818 (which is the adjacent ORF) for the sequence comparison. The new nomenclature for *C. dubliniensis* followed in the GeneDB database is also shown.

Table S2. Primers used

## List of PCR primers used for ChIP assays

| Primer                                         | Sequence                       | Chromosomal locations |
|------------------------------------------------|--------------------------------|-----------------------|
| For <i>CdCEN1</i>                              |                                |                       |
| CdCEN1-1(F)                                    | AAGCCCTTGGATGTTGACTACGC        | 1593208–1593231       |
| CdCEN1-2(R)                                    | CCATCGACAGGGCCCATGTG           | 1593417–1593398       |
| CdCEN1-3(F)                                    | TATGATTATACCCCAATCCA           | 1595086–1595105       |
| CdCEN1-4(R)                                    | AGGATCAGTTACCAATGTTG           | 1595287–1595268       |
| CdCEN1-3'(F)                                   | CAACAATCAACAATTTCTGCTCCTCATG   | 1596131–1596158       |
| CdCEN1-4'(R)                                   | AAGTGGGTATCACCTTATTCGCAAATGA   | 1596368–1596341       |
| CdCEN1-5(F)                                    | CCTTTTTAAACGTGACACGCTCAAA      | 1597063–1597087       |
| CdCEN1-6(R)                                    | GGAAAAGTTGCGTGAGGAAATGGA       | 1597302–1597279       |
| CdCEN1-5'(F)                                   | CGGGTGCATCTAAGAAGGGTTTTA       | 1598062–1598085       |
| CdCEN1-6'(R)                                   | CAATATAACCTTGCACCCGTCAAATACG   | 1598347–1598320       |
| CdCEN1-7(F)                                    | GTTGCAGTGCATTGTACGAGGTAAGCTC   | 1599081–1599108       |
| CdCEN1-8''(R)                                  | TGCAACTGATCCGAGACAACCTCAAAC    | 1599271–1599245       |
| CdCEN1-7'(F)                                   | GATCGCAAGCGAAGCACGAAATGAC      | 1600481–1600505       |
| CdCEN1-8'(R)                                   | CAATGTCTGTTGACCACCATTTCC       | 1600721–1600697       |
| CdCEN1-9(F)                                    | AGAGCGAGCACCTGGTATTTCCCAAG     | 1601290 – 1601314     |
| CdCEN1-10(R)                                   | CACCCAAAGCCGACTTAAATTC         | 1601509–1601486       |
| CdCEN1-9'(F)                                   | TTTCAATTTAGCTGACTCCTTACCTGG    | 1602167–1602194       |
| CdCEN1-10'(R)                                  | TTTTCGGTGATTTTGCCAAGAAGTTC     | 1602410 – 1602385     |
| CdCEN1-11(F)                                   | CAGCATTATCCGGGTAAAGTGTTG       | 1603320–1603344       |
| CdCEN1-12(R)                                   | CAACGGATCCAAGGTCACCATAG        | 1603543–1603519       |
| Control (Noncentromeric locus in chromosome 7) |                                |                       |
| CdLeu2-1(F)                                    | AACTATCACAGTCTTGCTGGTGA        | 119386–119409         |
| CdLeu2-2(R)                                    | ACAGCACCAAGTCCCCATT            | 119618–119637         |
| For <i>CdCEN2</i>                              |                                |                       |
| CdCEN2-1(F)                                    | CGCGGTCCAAGAAGATAATC           | 1940515–1940534       |
| CdCEN2-2(R)                                    | CATCATGGGATGTAATTGCT           | 1940649–1940668       |
| CdCEN2-3(F)                                    | AGTGTAAGTCTTCGGGATAC           | 1942509–1942528       |
| CdCEN2-4(R)                                    | GTTGAGCGAATAGAATAATTG          | 1942685–1942704       |
| CdCEN2-5(F)                                    | AGCTACATCTATTTTCAATGCACTC      | 1944606–1944630       |
| CdCEN2-6(R)                                    | AATTGCTCTGAAACAGCCAG           | 1944877–1944896       |
| CdCEN2-7(F)                                    | TATACCCCGAATTAACAAGTGC         | 1943700–1943724       |
| CdCEN2-8(R)                                    | CAGTGCAGGTGCTTTCGTTTACCAG      | 1943847–1943871       |
| CdCEN2-9(F)                                    | CATCAGTTCAATTGATGGGGTGTCTG     | 1945542–1945569       |
| CdCEN2-10(R)                                   | AAACTGGCATAGCTTTTTGCATTATTGCC  | 1945736–1945764       |
| CdCEN2-11(F)                                   | ATTTGAGAGGACTTGGTTCGTGC        | 1946646–1946669       |
| CdCEN2-12(R)                                   | CCGTACCCAAATAAACTCCAGC         | 1946844–1946867       |
| CdCEN2-15(F)                                   | TACAAAGCGGGTGATAAGGA           | 1947305–1947054       |
| CdCEN2-16(R)                                   | GGCGAAAAGGAAATAGC              | 1947234–1947217       |
| For <i>CdCEN3</i>                              |                                |                       |
| CdCEN3-1(F)                                    | ACACTGTCTTGTCTTGTGCTGAAGTCG    | 865133–865160         |
| CdCEN3-2(R)                                    | TTCTGTGTGTGGGCCCTCAGTAC        | 865293–865317         |
| CdCEN3-3(F)                                    | TCATCCATCATATCACAATCCTACTG     | 867274–867300         |
| CdCEN3-4(R)                                    | GTTATTTTGAAAGTTGGGGAGAGGG      | 867456–867480         |
| CdCEN3-5(F)                                    | CCTACGACATGAACACATCAACTACTC    | 869090–869117         |
| CdCEN3-6(R)                                    | TGCTTTTGTGAAAACCTGCGAAAC       | 869243–869267         |
| CdCEN3-7(F)                                    | AGGCTAGTCGGTGTTAACGGTGTGTG     | 870638–870665         |
| CdCEN3-8(R)                                    | GACTCGGAATAAACACCATCGCCGATGC   | 870856–870883         |
| CdCEN3-9(F)                                    | GGTCCAATTAGAATCGGGTCTGTTCCATG  | 872528–872555         |
| CdCEN3-10(R)                                   | CGTCATCCCTTCTATCTCTAACGTG      | 872683–872707         |
| For <i>CdCEN4</i>                              |                                |                       |
| CdCEN4-1(F)                                    | ATCATATCATGCAGCCCAACTCCG       | 1028245–1028268       |
| CdCEN4-2(R)                                    | CGGACGTAGTGAAACGATTGTTGG       | 1028410–1028433       |
| CdCEN4-3(F)                                    | ACAATTTCCAGTAAACCATTATAAAAG    | 1029835–1029861       |
| CdCEN4-4(R)                                    | CATTATAATCTGATTTGTAGGCTC       | 1029965–1029989       |
| CdCEN4-3'(F)                                   | TGCTAAACGACCCCTCAAAA           | 1030554–1030574       |
| CdCEN4-4'(R)                                   | GTACGACGATCATCAGCAACCAA        | 1030776–1030798       |
| CdCEN4-5(F)                                    | AATTAATTCGGATAGTTGGGGGAGACCG   | 1032446–1032473       |
| CdCEN4-6(R)                                    | ATTGAGCTGCTCACTTCACTGCCAC      | 1032619–1032643       |
| CdCEN4-5'(F)                                   | GCAGCGTCTTGTGACCGTGAG          | 1033199–1033220       |
| CdCEN4-6'(R)                                   | TTGAATTGGACAGGGGCTTAGG         | 1033477–1033498       |
| CdCEN4-7(F)                                    | TGTGGTGGAGGGTCATCCATTTGTTGGTTG | 1034406–1034435       |

| Primer        | Sequence                       | Chromosomal locations |
|---------------|--------------------------------|-----------------------|
| CdCEN4-8(R)   | GGCGACCCTCATGCAACCCTACCAATAAA  | 1034609-1034637       |
| CdCEN4-7'(F)  | AAGTACGGATGGTTGTTA             | 1035010 - 1035028     |
| CdCEN4-8'(R)  | TAGTCATTCTGCCATCTCTAT          | 1035231-1035252       |
| CdCEN4-9(F)   | CCATGAACAAAAGGTTAGGTGGTGCTCC   | 1036158-1036185       |
| CdCEN4-10(R)  | GGGGAGTTGAATGGTGTGGTGTAC       | 1036367-1036391       |
| For CdCEN5    |                                |                       |
| CdCEN5-7(F)   | TCCAGCGTCAGACATTTTCCAGT        | 494058-494081         |
| CdCEN5-8(R)   | TGCCCCGCGGTTGACAGT             | 494213-494230         |
| CdCEN5-1(F)   | TGGCCTCTCCCTTACAAAATTTGCC      | 495324-495349         |
| CdCEN5-2(R)   | GGGAGATGAGGGGTGATTGAGGTAATAG   | 495504-495531         |
| CdCEN5-3(F)   | GCTCCAGTACCAACGAAAACGACTTC     | 496907-496932         |
| CdCEN5-4(R)   | GCATTTGAAAACCTGCCAATGTAGTC     | 497035-497059         |
| CdCEN5-5(F)   | GCTGGGATAGTTTAGAGGCAGACTGTG    | 498944-498971         |
| CdCEN5-6(R)   | CCTCAATCACCCCTCATCTCCCTAC      | 499130-499155         |
| CdCEN5-9(F)   | AAGGGCAAGGAACAAGTACAAGT        | 500673-500696         |
| CdCEN5-10(R)  | TATCAGCGCCGGTTTTAGCAC          | 500941-500961         |
| For CdCEN6    |                                |                       |
| CdCEN6-15(F)  | GTGCCAACTTCTCCTGAT             | 1002806-1002824       |
| CdCEN6-16(R)  | AGCGATTATTAAGTCTATGTGG         | 1002985-1002964       |
| CdCEN6-13(F)  | GAAGCAGCGACCCCAACAGATAA        | 1003044-1003065       |
| CdCEN6-14(R)  | TTGAGCGAAATTTGGGTAGAGTC        | 1003262-1003283       |
| CdCEN6-5(F)   | TGTCCATTTCCCAAACCTTACACGGACCAC | 1004039-1004068       |
| CdCEN6-6(R)   | GAATGCTGGAAGGACTTGAGAAAATG     | 1004175-1004199       |
| CdCEN6-5'(F)  | GAAACCAATAACAAGGAAAAGAGTA      | 1005046-1005069       |
| CdCEN6-6'(R)  | CAATGGGAAAAGAAATCAGTAG         | 1005313-1005335       |
| CdCEN6-7(F)   | GACGAGAGCATGTACTCAACTACGTGTC   | 1006472-1006499       |
| CdCEN6-8(R)   | GAATCTTGATTGAAATGCGAGGAAC      | 1006668-1006692       |
| CdCEN6-9(F)   | CATCCAATAACATTGATTTACTACTTTTAG | 1008985-1009014       |
| CdCEN6-10(R)  | TTTTTTTTTCTCAAAGATTTAGCAG      | 1009115-1009139       |
| CdCEN6-9'(F)  | TGTACGATCAACCCAGAGTGC          | 1009504-1009524       |
| CdCEN6-10'(R) | ACATGCCATTACCAACAACAGTC        | 1009749-1009771       |
| CdCEN6-3(F)   | TAGCTGTATTAATAAAATCTGGCCGCATA  | 1015917-1015945       |
| CdCEN6-4(R)   | TCTGACAAAAAACCTCGTATGACCC      | 1016066-1016042       |
| For CdCEN7    |                                |                       |
| CdCEN7-1(F)   | CTAGAGCTATGTTGTGACAGTCCACC     | 427615-427640         |
| CdCEN7-2(R)   | CTTCTGGAATTGAGCCAATCCCTAG      | 427777-427801         |
| CdCEN7-3(F)   | CTAGCTATTCAAGCATCCGTAGGCAGTC   | 429103-429130         |
| CdCEN7-4(R)   | CCCATACCCGGTGGTGTAGTATAA       | 429228-429252         |
| CdCEN7-5(F)   | GTAGGCGCTACATATGAACCTCGTGC     | 436328-436354         |
| CdCEN7-6(R)   | AGATAATGTCTGAATGTCATTCGGG      | 436479-436504         |
| CdCEN7-9'(F)  | TCCAATGGGTGCTAAGATGAA          | 434047-434068         |
| CdCEN7-10'(R) | TCCCGCTGATTTTTGAA              | 434292-434310         |
| CdCEN7-7(F)   | TTATTTGATAGCCTAATTTACCTGATG    | 438005-438031         |
| CdCEN7-8(R)   | ATTAAGTACTTTGAACCAGCAATG       | 438205-438230         |
| CdCEN7-9(F)   | AACGGTCCCTGATGAATAGAGTGGC      | 432732-432758         |
| CdCEN7-10(R)  | GACTGAAGCGTCCATACTTGGGATC      | 432956-432981         |
| CdCEN7-11(F)  | CCCAGAAGTATCCACTAGGGAACCTG     | 435240-435268         |
| CdCEN7-12(R)  | TTGTTCTGGTCAATGGTACAGCAAC      | 435365-435390         |
| CdCEN7-13(F)  | CACGCAACTAGAATGGCATGAATATATG   | 439500-439527         |
| CdCEN7-14(R)  | AGATCCGGTGTCTGTCTTATTGCTC      | 439630-439654         |
| CdCEN7-15(F)  | CCTGCGTTGTAATCATTGTGTGTC       | 440443-440466         |
| CdCEN7-16(R)  | TTACTCCGCCCTTGTATCCCTATTT      | 440640-440617         |
| For CdCENR    |                                |                       |
| CdCENR-1(R)   | ATTAAGGAGCTTCTGTGAGGCTGTGC     | 1723671-1723647       |
| CdCENR-2(F)   | CATTTCTTCAAAGGCACCGGGATG       | 1723429-1723453       |
| CdCENR-3(R)   | ACGTTGCTTACTGGTGGCTATGCGG      | 1721710-1721686       |
| CdCENR-4(F)   | AAGCTTTTATTGCGGTGAACTGGGG      | 1721461-1721485       |
| CdCENR-5(R)   | ACATATAATAGCCTACCACACGCCTTGC   | 1719373-1719346       |
| CdCENR-6(F)   | TGACATTGTGGAAAGTTAATCGCGG      | 1719202-1719226       |
| CdCENR-7(R)   | TGAAATTGGAGACTAAGTGTTCATTCCG   | 1717531-1717504       |
| CdCENR-8(F)   | ACAGTTTCCACACAACCTCAGCAAGACA   | 1717330-1717356       |
| CdCENR-9(R)   | TTTGCCGGGATAAGCTTTTATTGCG      | 1715642-1715618       |
| CdCENR-10(F)  | TTTCAGGACACCAGAAGATGGCCAC      | 1715409-1715433       |
| CdCENR-9'(F)  | CCCCGCCGTGAAAAACA              | 1713200-1713217       |

| Primer        | Sequence                  | Chromosomal locations |
|---------------|---------------------------|-----------------------|
| CdCENR-10'(R) | CTACAAACGCCACACCCGAACT    | 1713426–1713404       |
| CdCENR-11(R)  | ACCTCAACATCGACACAGTCGCACC | 1712709–1712185       |
| CdCENR-12(F)  | AGCAGAAACCTCGATGTTTGAGCCG | 1712487–1712511       |

The coordinates of the *C. dubliniensis* (Cd) chromosomes correspond to the present version of the *Candida dubliniensis* Genome Database (May 16, 2007).

#### List of PCR primers used for Cse4 complementation experiments

| Primer  | Sequence                            |
|---------|-------------------------------------|
| FCaCse4 | CCCGAGCTCCAATTAACAAATATTAATTACAAATG |
| RCaCse4 | TGCTCTAGACCAAAATCCCTCTTTCTGTATTTG   |
| FCdCse4 | CCCGAGCTCCAAGTGTATTTTTCATCTTTGGTAG  |
| RCdCse4 | CCCAAGCTTCTATTTTGCCACCAAAACCCATCTT  |

**Table S3. Sequence coordinates of the Cse4p-binding and the pericentric regions in all the chromosomes of *C. albicans* and *C. dubliniensis***

| Chr no. | Regions               | <i>C. albicans</i> coordinates | <i>C. dubliniensis</i> coordinates |
|---------|-----------------------|--------------------------------|------------------------------------|
| R       | Region from left ORF  | 1748819–1750873                | 1713450–1716138                    |
|         | Cse4-binding region   | 1750874–1755348                | 1716139–1720954                    |
|         | Region from right ORF | 1755349–1757404                | 1720955–1722609                    |
| 1       | Region from left ORF  | 1561872–1564187                | 1594163–1596130                    |
|         | Cse4-binding region   | 1564188–1567117                | 1596131–1600697                    |
|         | Region from right ORF | 1567118–1580116                | 1600698–1611889                    |
| 2       | Region from left ORF  | 1924364–1928514                | 1939609–1943699                    |
|         | Cse4-binding region   | 1928515–1931474                | 1943700–1946867                    |
|         | Region from right ORF | 1931475–1931569                | 1946868–1947202                    |
| 3       | Region from left ORF  | 821379–823848                  | 866084–867273                      |
|         | Cse4-binding region   | 823849–826997                  | 867274–870883                      |
|         | Region from right ORF | 826998–827104                  | 870884–871878                      |
| 4       | Region from left ORF  | 1000559–1002628                | 1027127–1029834                    |
|         | Cse4-binding region   | 1002629–1006266                | 1029835–1034637                    |
|         | Region from right ORF | 1006267–1009311                | 1034638–1036395                    |
| 5       | Region from left ORF  | 467209–469044                  | 494073–495323                      |
|         | Cse4-binding region   | 469045–472074                  | 495324–499155                      |
|         | Region from right ORF | 472075–473740                  | 499156–500591                      |
| 6       | Region from left ORF  | 975879–976872                  | 993828–1003043                     |
|         | Cse4-binding region   | 976873–980625                  | 1003044–1006692                    |
|         | Region from right ORF | 980626–981389                  | 1006693–1009568                    |
| 7       | Region from left ORF  | 423632–426037                  | 425994–435239                      |
|         | Cse4-binding region   | 426038–428938                  | 435240–438230                      |
|         | Region from right ORF | 428939–430172                  | 438231–439177                      |

The DNA sequences present on either side of the *C. dubliniensis* Cse4-binding regions, orthologous to *C. albicans* CEN-containing ORF-free regions, are considered as pericentric regions. The region considered for pericentric sequence analysis in chromosome 6 in *C. dubliniensis* is the intergenic region between an ORF with no known *C. albicans* homolog (Cd36.65030) and the homolog of Orf19.4553 (Cd36.64990) (see supporting Fig. S1).



**Table S4. Homology between the repeats in the pericentric region of *C. albicans* and *C. dubliniensis***

| Chr no. | Repeat | Coordinates in <i>C. dubliniensis</i> | % homology between the inverted repeats* |
|---------|--------|---------------------------------------|------------------------------------------|
| R       | IRR    | 1720958–1721270 (D)                   | 100                                      |
|         | IRR    | 1716158–1715822 (R)                   |                                          |
| 1       | IR1    | 1595932–1595989 (D)                   | 96                                       |
|         | IR1    | 1602853–1602907 (R)                   |                                          |
| 5       | IR5    | 493690–494369 (D)                     | 99                                       |
|         | IR5    | 500277–500974 (R)                     |                                          |

A BLAST search was done to identify the repeats flanking the *CEN* region against the *C. dubliniensis* genome database with *C. albicans* *CEN* flanking repeats as the query sequences (10). The inverted repeats (IRR, IR1, and IR5) were observed in the chromosomes R, 1, and 5 of *C. albicans* and *C. dubliniensis*, respectively. The Epsilon repeats were observed in chromosomes 1, 2, 3, and 6 of *C. dubliniensis* but their homology is <25%. The Episemon repeats flank the *CEN6* region in both *C. albicans* and *C. dubliniensis*. \*ClustalW scores

**Table S5. List of strains**

| Yeast strains               | Genotype                                                                                                                                                                                                                   | Source     |
|-----------------------------|----------------------------------------------------------------------------------------------------------------------------------------------------------------------------------------------------------------------------|------------|
| <i>Candida dubliniensis</i> |                                                                                                                                                                                                                            |            |
| Cd36                        | Clinical isolate                                                                                                                                                                                                           | 13         |
| CdUM4B                      | <i>ura3D1::FRT/ ura3D2::FRT</i>                                                                                                                                                                                            | 9          |
| CdM1                        | <i>ura3D1::FRT/ ura3D2::FRT MIF2/MIF2-TAP (URA3)</i>                                                                                                                                                                       | This study |
| <i>C. albicans</i>          |                                                                                                                                                                                                                            |            |
| BWP17                       | $\Delta$ <i>ura3::imm434/</i> $\Delta$ <i>ura3::imm434</i> $\Delta$ <i>his1::hisG/</i> $\Delta$ <i>his1::hisG</i> $\Delta$ <i>arg4::hisG/</i> $\Delta$ <i>arg4::hisG</i>                                                   | 14         |
| CAKS1b                      | $\Delta$ <i>ura3::imm434/</i> $\Delta$ <i>ura3::imm434</i> $\Delta$ <i>his1::hisG/</i> $\Delta$ <i>his1::hisG</i> $\Delta$ <i>arg4::hisG/</i> $\Delta$ <i>arg4::hisG</i> <i>CSE4/</i> <i>cse4::hisG:URA:hisG</i>           | This study |
| CAKS2b                      | $\Delta$ <i>ura3::imm434/</i> $\Delta$ <i>ura3::imm434</i> $\Delta$ <i>his1::hisG/</i> $\Delta$ <i>his1::hisG</i> $\Delta$ <i>arg4::hisG/</i> $\Delta$ <i>arg4::hisG</i> <i>CSE4/</i> <i>cse4::hisG</i>                    | This study |
| CAKS3b                      | $\Delta$ <i>ura3::imm434/</i> $\Delta$ <i>ura3::imm434</i> $\Delta$ <i>his1::hisG/</i> $\Delta$ <i>his1::hisG</i> $\Delta$ <i>arg4::hisG/</i> $\Delta$ <i>arg4::hisG</i> <i>cse4::PCK1pr-CSE4(URA3)/</i> <i>cse4::hisG</i> | This study |
